# Supplementary material
Source: PubMed Central journal article supplement (PMC8218761)
Supplement: jcm.00521-21-s0001.pdf [file jcm.00521-21-s0001.pdf]

**TABLE S1** Overview of results from the colony (used as the reference method) or the direct MALDI-TOF MS testing of 406 (340 monomicrobial and 66 polymicrobial) positive blood culture samples for anaerobic bacteria

| Bacterial species (no. isolates from samples) <sup>a</sup>                                         | Bacterial species (no. samples) with a log(score) value at direct MALDI-TOF MS testing of |                                         |
|----------------------------------------------------------------------------------------------------|-------------------------------------------------------------------------------------------|-----------------------------------------|
|                                                                                                    | ≥1.9                                                                                      | <1.9-≥1.7                               |
| <b>Monomicrobial blood cultures</b>                                                                |                                                                                           |                                         |
| Gram-negative anaerobic bacteria (170)                                                             |                                                                                           |                                         |
| <i>Aggregatibacter actinomycetemcomitans</i> (1)                                                   | –                                                                                         | –                                       |
| <i>Bacteroides faecis</i> (2)                                                                      | <i>Bacteroides faecis</i> (2)                                                             |                                         |
| <i>Bacteroides fragilis</i> (93)                                                                   | <i>Bacteroides fragilis</i> (91)                                                          | <i>Bacteroides fragilis</i> (1)         |
| <i>Bacteroides ovatus</i> (7)                                                                      | <i>Bacteroides ovatus</i> (6)                                                             |                                         |
| <i>Bacteroides thetaiotaomicron</i> (18)                                                           | <i>Bacteroides thetaiotaomicron</i> (16)                                                  | <i>Bacteroides thetaiotaomicron</i> (2) |
| <i>Bacteroides uniformis</i> (6)                                                                   | <i>Bacteroides uniformis</i> (5)                                                          |                                         |
| <i>Bacteroides vulgatus</i> (7)                                                                    | <i>Bacteroides vulgatus</i> (6)                                                           | <i>Bacteroides vulgatus</i> (1)         |
| <i>Butyrivimonas virosa</i> (1)                                                                    | –                                                                                         | –                                       |
| <i>Dialister pneumosintes</i> (1)                                                                  | –                                                                                         | –                                       |
| <i>Fusobacterium mortiferum</i> (1)                                                                |                                                                                           | <i>Fusobacterium mortiferum</i> (1)     |
| <i>Fusobacterium naviforme</i> (1)                                                                 | –                                                                                         | –                                       |
| <i>Fusobacterium necrophorum</i> (1)                                                               | <i>Fusobacterium necrophorum</i> (1)                                                      |                                         |
| <i>Fusobacterium nucleatum</i> (6)                                                                 | <i>Fusobacterium nucleatum</i> (2)                                                        |                                         |
| <i>Leptotrichia trevisanii</i> (2)                                                                 | –                                                                                         | –                                       |
| <i>Parabacteroides distasonis</i> (3)                                                              | <i>Parabacteroides distasonis</i> (3)                                                     |                                         |
| <i>Parabacteroides johnsonii</i> (1)                                                               | –                                                                                         | –                                       |
| <i>Prevotella baroniae</i> (1)                                                                     | –                                                                                         | –                                       |
| <i>Prevotella bivia</i> (3)                                                                        | <i>Prevotella bivia</i> (2)                                                               |                                         |
| <i>Prevotella buccae</i> (3)                                                                       | <i>Prevotella buccae</i> (1)                                                              | <i>Prevotella buccae</i> (1)            |
| <i>Prevotella denticola</i> (2)                                                                    | <i>Prevotella denticola</i> (1)                                                           |                                         |
| <i>Prevotella heparinolytica</i> (1)                                                               | <i>Prevotella heparinolytica</i> (1)                                                      |                                         |
| <i>Prevotella oris</i> (1)                                                                         | <i>Prevotella oris</i> (1)                                                                |                                         |
| <i>Tissierella praeacuta</i> (1)                                                                   | –                                                                                         | –                                       |
| <i>Veillonella atipica</i> (2)                                                                     | <i>Veillonella atipica</i> (1)                                                            |                                         |
| <i>Veillonella parvula</i> (5)                                                                     | <i>Veillonella parvula</i> (1)                                                            |                                         |
| Gram-positive bacteria (170)                                                                       |                                                                                           |                                         |
| <i>Actinomyces odontolyticus</i> (1)                                                               | –                                                                                         | –                                       |
| <i>Actinotignum sanguinis</i> (2)                                                                  | –                                                                                         | –                                       |
| <i>Atopobium parvulum</i> (2)                                                                      |                                                                                           | <i>Atopobium parvulum</i> (1)           |
| <i>Bifidobacterium bifidum</i> (1)                                                                 | –                                                                                         | –                                       |
| <i>Bifidobacterium breve</i> (6)                                                                   |                                                                                           | <i>Bifidobacterium breve</i> (1)        |
| <i>Bifidobacterium longum</i> (2)                                                                  | <i>Bifidobacterium longum</i> (1)                                                         |                                         |
| <i>Clostridium aldenense</i> (1)                                                                   | –                                                                                         | –                                       |
| <i>Clostridium clostridioforme</i> (3)                                                             | <i>Clostridium clostridioforme</i> (2)                                                    |                                         |
| <i>Clostridium innocuum</i> (1)                                                                    | <i>Clostridium innocuum</i> (1)                                                           |                                         |
| <i>Clostridium paraputrificum</i> (3)                                                              | <i>Clostridium paraputrificum</i> (3)                                                     |                                         |
| <i>Clostridium perfringens</i> (23)                                                                | <i>Clostridium perfringens</i> (20)                                                       |                                         |
| <i>Clostridium ramosum</i> (2)                                                                     | <i>Clostridium ramosum</i> (1)                                                            | <i>Clostridium ramosum</i> (1)          |
| <i>Clostridium septicum</i> (1)                                                                    |                                                                                           | <i>Clostridium septicum</i> (1)         |
| <i>Clostridium sordellii</i> (2)                                                                   | <i>Clostridium sordellii</i> (2)                                                          |                                         |
| <i>Clostridium sporogenes</i> (1)                                                                  | –                                                                                         | –                                       |
| <i>Clostridium subterminale</i> (1)                                                                | –                                                                                         | –                                       |
| <i>Clostridium tertium</i> (2)                                                                     | <i>Clostridium tertium</i> (2)                                                            |                                         |
| <i>Cutibacterium</i> (formerly <i>Propionibacterium</i> ) <i>acnes</i> (69)                        | <i>Cutibacterium acnes</i> (4)                                                            | <i>Cutibacterium acnes</i> (3)          |
| <i>Cutibacterium avidum</i> (1)                                                                    | –                                                                                         | –                                       |
| <i>Cutibacterium lymphophilum</i> (1)                                                              | –                                                                                         | –                                       |
| <i>Eggerthella lenta</i> (15)                                                                      |                                                                                           | <i>Eggerthella lenta</i> (2)            |
| <i>Parvimonas micra</i> (22)                                                                       | <i>Parvimonas micra</i> (9)                                                               | <i>Parvimonas micra</i> (3)             |
| <i>Peptoniphilus harei</i> (2)                                                                     | <i>Peptoniphilus harei</i> (1)                                                            |                                         |
| <i>Ruminococcus gnavus</i> (3)                                                                     | <i>Ruminococcus gnavus</i> (1)                                                            |                                         |
| <i>Solobacterium moorei</i> (1)                                                                    | –                                                                                         | –                                       |
| <i>Staphylococcus saccharolyticus</i> (2)                                                          | –                                                                                         | –                                       |
| <b>Polymicrobial blood cultures</b>                                                                |                                                                                           |                                         |
| Gram-negative/Gram-positive anaerobic bacteria (85) <sup>b</sup>                                   |                                                                                           |                                         |
| <i>Allocardovia omnicoles</i> (1) + <i>Bacteroides fragilis</i> (1)                                | <i>Bacteroides fragilis</i> (1)                                                           |                                         |
| <i>Atopobium parvulum</i> (1) + <i>Veillonella parvula</i> (1)                                     | <i>Veillonella parvula</i> (1)                                                            |                                         |
| <i>Bacteroides fragilis</i> + <i>Citrobacter koseri</i> (1)                                        | <i>Bacteroides fragilis</i> (1)                                                           |                                         |
| <i>Bacteroides fragilis</i> (1) + <i>Citrobacter koseri</i> (1) + <i>Enterococcus faecalis</i> (1) |                                                                                           | <i>Bacteroides fragilis</i> (1)         |

|                                                                                                                     |                                    |                                    |
|---------------------------------------------------------------------------------------------------------------------|------------------------------------|------------------------------------|
| <i>Bacteroides fragilis</i> (1) + <i>Clostridium cadaveris</i> (1)                                                  | –                                  | –                                  |
| <i>Bacteroides fragilis</i> (1) + <i>Clostridium clostridioforme</i> (1)                                            | –                                  | –                                  |
| <i>Bacteroides fragilis</i> (1) + <i>Enterococcus faecalis</i> (1) + <i>Klebsiella pneumoniae</i> (1)               | <i>Bacteroides fragilis</i> (1)    |                                    |
| <i>Bacteroides fragilis</i> (4) + <i>Escherichia coli</i> (4)                                                       | –                                  | –                                  |
| <i>Bacteroides fragilis</i> (1) + <i>Escherichia coli</i> (1) + <i>Streptococcus anginosus</i> (1)                  |                                    | <i>Bacteroides fragilis</i> (1)    |
| <i>Bacteroides fragilis</i> (1) + <i>Gemella morbillorum</i> (1)                                                    | –                                  | –                                  |
| <i>Bacteroides fragilis</i> (1) + <i>Klebsiella pneumoniae</i> (1)                                                  | <i>Bacteroides fragilis</i> (1)    |                                    |
| <i>Bacteroides fragilis</i> (1) + <i>Morganella morganii</i> (1) <sup>c</sup>                                       | –                                  | –                                  |
| <i>Bacteroides fragilis</i> (2) + <i>Staphylococcus epidermidis</i> (2)                                             | –                                  | –                                  |
| <i>Bacteroides fragilis</i> (1) + <i>Streptococcus anginosus</i> (1)                                                |                                    | <i>Bacteroides fragilis</i> (1)    |
| <i>Bacteroides intestinalis</i> (1) + <i>Clostridium aldenense</i> (1)                                              | –                                  | –                                  |
| <i>Bacteroides thetaiotaomicron</i> + <i>Proteus mirabilis</i> (1) <sup>c</sup>                                     | –                                  | –                                  |
| <i>Bacteroides thetaiotaomicron</i> (1) + <i>Pseudomonas monteilii</i> (1)                                          | –                                  | –                                  |
| <i>Bacteroides thetaiotaomicron</i> (1) + <i>Serratia marcescens</i> (1) <sup>c</sup>                               | –                                  | –                                  |
| <i>Bacteroides uniformis</i> (1) + <i>Bacteroides vulgatus</i> (1)                                                  | –                                  | –                                  |
| <i>Bacteroides vulgatus</i> (1) + <i>Escherichia coli</i> (1)                                                       | –                                  | –                                  |
| <i>Bacteroides vulgatus</i> (1) + <i>Parabacteroides distasonis</i> (1)                                             |                                    | <i>Bacteroides vulgatus</i> (1)    |
| <i>Bifidobacterium breve</i> (1) + <i>Clostridium ramosum</i> (1) + <i>Escherichia coli</i> (1) <sup>c</sup>        | –                                  | –                                  |
| <i>Bifidobacterium breve</i> (1) + <i>Klebsiella pneumoniae</i> (1) + <i>Staphylococcus aureus</i> (1) <sup>c</sup> | <i>Bifidobacterium breve</i> (1)   |                                    |
| <i>Capnocytophaga gingivalis</i> (1) + <i>Veillonella parvula</i> (1)                                               | <i>Veillonella parvula</i> (1)     |                                    |
| <i>Clostridium butyricum</i> (1) + <i>Clostridium sporogenes</i> (1) + <i>Clostridium tertium</i> (1)               | –                                  | –                                  |
| <i>Clostridium clostridioforme</i> (1) + <i>Clostridium perfringens</i> (1) + <i>Veillonella parvula</i> (1)        | –                                  | –                                  |
| <i>Clostridium clostridioforme</i> (1) + <i>Peptoniphilus harei</i> (1)                                             | –                                  | –                                  |
| <i>Clostridium clostridioforme</i> (1) + <i>Proteus mirabilis</i> (1)                                               | –                                  | –                                  |
| <i>Clostridium hathewayi</i> (1) + <i>Escherichia coli</i> (1) + <i>Streptococcus anginosus</i> (1)                 | –                                  | –                                  |
| <i>Clostridium paraputrificum</i> (1) + <i>Escherichia coli</i> (1)                                                 | –                                  | –                                  |
| <i>Clostridium perfringens</i> (1) + <i>Enterococcus faecalis</i> (1) + <i>Staphylococcus epidermidis</i> (1)       | –                                  | –                                  |
| <i>Clostridium perfringens</i> (1) + <i>Enterococcus faecium</i> + <i>Escherichia coli</i> (1)                      | –                                  | –                                  |
| <i>Clostridium perfringens</i> (1) + <i>Enterococcus gallinarum</i> (1) <sup>c</sup>                                | <i>Clostridium perfringens</i> (1) |                                    |
| <i>Clostridium perfringens</i> (3) + <i>Escherichia coli</i> (3)                                                    | <i>Clostridium perfringens</i> (1) |                                    |
| <i>Clostridium perfringens</i> (1) + <i>Escherichia coli</i> (1) + <i>Klebsiella pneumoniae</i> (1)                 | –                                  | –                                  |
| <i>Clostridium perfringens</i> (1) + <i>Klebsiella oxytoca</i> (1) + <i>Proteus mirabilis</i> (1)                   | –                                  | –                                  |
| <i>Clostridium perfringens</i> (1) + <i>Klebsiella variicola</i> (1)                                                | <i>Clostridium perfringens</i> (1) |                                    |
| <i>Clostridium perfringens</i> (1) + <i>Pseudomonas aeruginosa</i> (1) + <i>Streptococcus anginosus</i> (1)         | –                                  | –                                  |
| <i>Clostridium perfringens</i> (2) + <i>Staphylococcus aureus</i> (2)                                               | –                                  | –                                  |
| <i>Clostridium perfringens</i> (1) + <i>Staphylococcus capitis</i> (1)                                              | <i>Clostridium perfringens</i> (1) |                                    |
| <i>Clostridium perfringens</i> (2) + <i>Staphylococcus epidermidis</i> (2)                                          |                                    | <i>Clostridium perfringens</i> (1) |
| <i>Clostridium perfringens</i> (1) + <i>Streptococcus anginosus</i> (1)                                             |                                    | <i>Clostridium perfringens</i> (1) |
| <i>Clostridium ramosum</i> (1) + <i>Enterococcus faecium</i> (1)                                                    | –                                  | –                                  |
| <i>Clostridium ramosum</i> (1) + <i>Escherichia coli</i> (1) <sup>c</sup>                                           | –                                  | –                                  |
| <i>Clostridium ramosum</i> (1) + <i>Staphylococcus hominis</i> (1)                                                  | –                                  | –                                  |
| <i>Clostridium ramosum</i> (1) + <i>Streptococcus anginosus</i> (1)                                                 | –                                  | –                                  |
| <i>Clostridium septicum</i> (1) + <i>Escherichia coli</i> (1)                                                       | –                                  | –                                  |
| <i>Clostridium tertium</i> (1) + <i>Klebsiella oxytoca</i> (1) <sup>c</sup>                                         | –                                  | –                                  |
| <i>Eggerthella lenta</i> (1) + <i>Brevibacterium casei</i> (1)                                                      | –                                  | –                                  |
| <i>Eggerthella lenta</i> (1) + <i>Escherichia coli</i> (1)                                                          | –                                  | –                                  |
| <i>Eggerthella lenta</i> (1) + <i>Staphylococcus aureus</i> (1)                                                     | –                                  | –                                  |
| <i>Eggerthella lenta</i> (1) + <i>Veillonella parvula</i> (1)                                                       | –                                  | –                                  |
| <i>Fusobacterium gonidiaformans</i> (1) + <i>Granulicatella elegans</i> (1)                                         | –                                  | –                                  |
| <i>Parvimonas micra</i> (1) + <i>Peptoniphilus harei</i> (1)                                                        | <i>Peptoniphilus harei</i> (1)     |                                    |
| <i>Parvimonas micra</i> (1) + <i>Prevotella nanciensis</i> (1)                                                      | –                                  | –                                  |
| <i>Parvimonas micra</i> (1) + <i>Streptococcus constellatus</i> (1) + <i>Streptococcus oralis</i> (1)               | –                                  | –                                  |
| <i>Parvimonas micra</i> (1) + <i>Veillonella parvula</i> (1) + <i>Streptococcus anginosus</i> (1)                   |                                    | <i>Parvimonas micra</i> (1)        |
| <i>Prevotella buccae</i> (1) + <i>Streptococcus anginosus</i> (1)                                                   | –                                  | –                                  |

<sup>a</sup>Species were designed according to the current Bruker MALDI BioTyper (MBT) main spectrum (MSP) library (version April 2019), which contains 8,468 MSPs from 2,950 microbial (bacterial, yeast, or filamentous fungal) species. This was for all listed organisms except for *Clostridium sordellii* or *Clostridium hathewayi*, which had been reclassified as *Paeniclostridium sordellii* (in 2016) and *Hungatella hathewayi* (in 2014), respectively, and then renamed such in updated versions of the Bruker MALDI BioTyper (MBT) main spectrum (MSP) library.

<sup>b</sup>Listed are also aerobic bacterial species that accounted for 60 isolates in total. Direct MALDI-TOF MS testing did not allow identification in 52 (86.7%) of 60 isolates.

<sup>c</sup>This was one of eight aerobic species to have a log(score) value of  $\geq 1.9$  at direct MALDI-TOF MS testing.
